# Supplementary material for: Defects of mitochondrial RNA turnover lead to the accumulation of double-stranded RNA in vivo
Source: PubMed Central journal article supplement (PMC6668790; doi:10.1371/journal.pgen.1008240), 2019-07-31
Supplement: pgen.1008240.s007.pdf [file pgen.1008240.s007.pdf]

S1 Table. Taqman Probes and oligonucleotides used in this study

| <b>Taqman Assays</b>                                                |                                                                              |
|---------------------------------------------------------------------|------------------------------------------------------------------------------|
| DmMTPNPase                                                          | Dm02146799_g1                                                                |
| DmSUV3                                                              | Dm02136650_g1                                                                |
| DmRpL32                                                             | Dm02151827_g1                                                                |
| DmMT-ND1                                                            | AI70K4C                                                                      |
| DmMT-ND2                                                            | AI20SFG                                                                      |
| DmMT-CYTB                                                           | AILJEB                                                                       |
| DmMT-ND5                                                            | AIHSOVN                                                                      |
| DmMT-COX1                                                           | AII1M1V                                                                      |
| DmMT-COX3                                                           | AI89JAK                                                                      |
| DmMT-ND3                                                            | AIFASI7                                                                      |
| DmMT-ND4L                                                           | AI5IORW                                                                      |
| DmMT-ND6                                                            | AI6RMX4                                                                      |
| <b>Primers for cloning PNP-GFP and PNP-FLAG constructs 5'-3'</b>    |                                                                              |
| DmPNPase_Xhal_F                                                     | ATGGCCATGATTTTCACAC                                                          |
| DmPNPase_FLAG_Xbal_R                                                | CTCTCCTCTAGACTACTTATCGTCGTCATCCTTGTAATCCGT<br>TCCGCTCTCTCCGGCAG              |
| DmPNPase_Kpn1_R                                                     | ATGGTACCCGTTCCGCTCTCTCC                                                      |
| <b>Primers for generating gRNA and screening for PNPaseKO lines</b> |                                                                              |
| pCFD4_PNP-1_F                                                       | TATATAGGAAAGATATCCGGGTGAACTTCGACCTTCAGTTCC<br>GGCCGCCGTTTTAGAGCTAGAAATAGCAAG |
| pCFD4_PNP-2_R                                                       | ATTTTAACTTGCTATTTCTAGCTCTAAAACAATCTAATATTCT<br>GGACATCGACGTTAAATTGAAAATAGGTC |
| MTPNP_927_ScrPCR1_F                                                 | AGCTGCTCAACTATCGCCTC                                                         |
| MTPNP_ScrPCR1_R                                                     | CTGGCCGGGATTTGGCTTCG                                                         |
| MTPNPKO_ScrPCR2_F                                                   | GACCTTCAGTTCCGGCGA                                                           |
| <b>Primers for qRT-PCR quantification of mRNAs</b>                  |                                                                              |
| DmBSF_3809_F                                                        | GAGGGATTGATATTGCGGCA                                                         |
| DmBSF_3680_R                                                        | CTTGACCACAGAAATCGAT                                                          |
| His2B_F                                                             | CTGGCAAGGCTCAGAAGAAC                                                         |
| His2B_R                                                             | AAATTCCGGTGTTCAGGATGG                                                        |
| 12S_F                                                               | GATAACGACGGTATATAAACTGATTACA                                                 |
| 12S_R                                                               | GAGGAACCTGTTTTTTAATCGA                                                       |
| 16S_F                                                               | ACCTGGCTTACACCGGTTT                                                          |
| 16S_R                                                               | GGGTGTAGCCGTTCAAATTT                                                         |
| <b>Primers for qPCR quantification of mtDNA</b>                     |                                                                              |
| 12S_F                                                               | GATAACGACGGTATATAAACTGATTACA                                                 |
| 12S_R                                                               | GAGGAACCTGTTTTTTAATCGA                                                       |
| COX3_F                                                              | CAGACTCAATTTATGGATCAACATT                                                    |
| COX3_R                                                              | AAAGTTGTTCCGATTAATACATGAA                                                    |
| COX1_F                                                              | CAGGATGAACTGTTTATCCACCTTT                                                    |
| COX1_R                                                              | AATCCCTGCTAAATGTAGAGAAAAAATAG                                                |

|        |                         |
|--------|-------------------------|
| ND1_F  | AGCCAAACCCCCTCTTCTA     |
| ND1_R  | TTTTGATTTTGCTGAAGGAGAAT |
| RP49_F | CGGATCGATATGCTAAGCTGT   |
| RP49_R | CGACGCACTCTGTTGTCG      |

### Primers for 3'RACE

|             |                             |
|-------------|-----------------------------|
| Linker      | ATGTGAGATCATGCACAGTCATA     |
| Anti-linker | GACTGTGCATGATCTCAC          |
| COX1_F      | GCTTACACAACATGAAATATTGTATCA |
| ND1_F (R2)  | GGAACCTTACCTCGATTT          |
| 16S_F (R2)  | GACCTCGATGTTGGATTAAGATATAAT |

### Northern blot oligonucleotide probes and primers for double stranded probes

|                    |                              |
|--------------------|------------------------------|
| tRNA-Gln           | AACTTTTGTGCATCATACACCAA      |
| tRNA-Trp           | CTTTATTTATAGCTTTGAAGGTTATTAG |
| tRNA-Cys           | GCCTTAGTAAAACCTTACTCCTTCAAAA |
| tRNA-Tyr           | ATCTATCGCCTAAACTTCAGCC       |
| tRNA-Gly           | AATAGACCTTATGATTGGAAGTCAA    |
| tRNA-Ala           | AATGTTATATTTAACTACAACCCT     |
| tRNA-Asn           | TCATTAACAGTGATATGCCTC        |
| tRNA-Phe           | CTTCAATGTCAAACCTCTAGT        |
| tRNA-Thr           | TTTTTGATTTACAAGACCAATGTTTT   |
| tRNA-Pro           | AGAAATTTCTTTTTCATTAATCCCCAAA |
| tRNA-Val           | TTTGCACAAAAATCTTTTCAATG      |
| tRNA-Met           | TGGGGTATGAACCCAGTAG          |
| tRNA-Ser1          | CAAAACATATGCTTATTCAAGCTCA    |
| tRNA-Leu2          | TTATTGCACTAATCTGCCAAAATAGT   |
| anti-tRNA-Cys      | TTTTGAAGGAGTAAGTTTTACTAAGGC  |
| Cytosolic tRNA-Val | GTGATAACCGCTACACTACGGAAA     |
